# Supplementary material
Source: PubMed Central journal article supplement (PMC8131244)
Supplement: NIHMS1684615-supplement-Supplementary_material.pdf [file NIHMS1684615-supplement-Supplementary_material.pdf]

## Supporting Information for

Benzalkonium chloride disinfectants induce apoptosis, inhibit proliferation, and activate the integrated stress response in a 3-D *in vitro* model of neurodevelopment

Josi M. Herron<sup>1</sup>, Hideaki Tomita<sup>2</sup>, Collin C. White<sup>1</sup>, Terrance J. Kavanagh<sup>1</sup>, Libin Xu<sup>1,2,\*</sup>

<sup>1</sup>Department of Environmental and Occupational Health Sciences, University of Washington, Seattle, WA

<sup>2</sup>Department of Medicinal Chemistry, University of Washington, Seattle, WA

\*Corresponding author:

Libin Xu, Ph.D.

Email: [libinxu@uw.edu](mailto:libinxu@uw.edu)

Phone: (206) 543-1080

Fax: (206) 685-3252

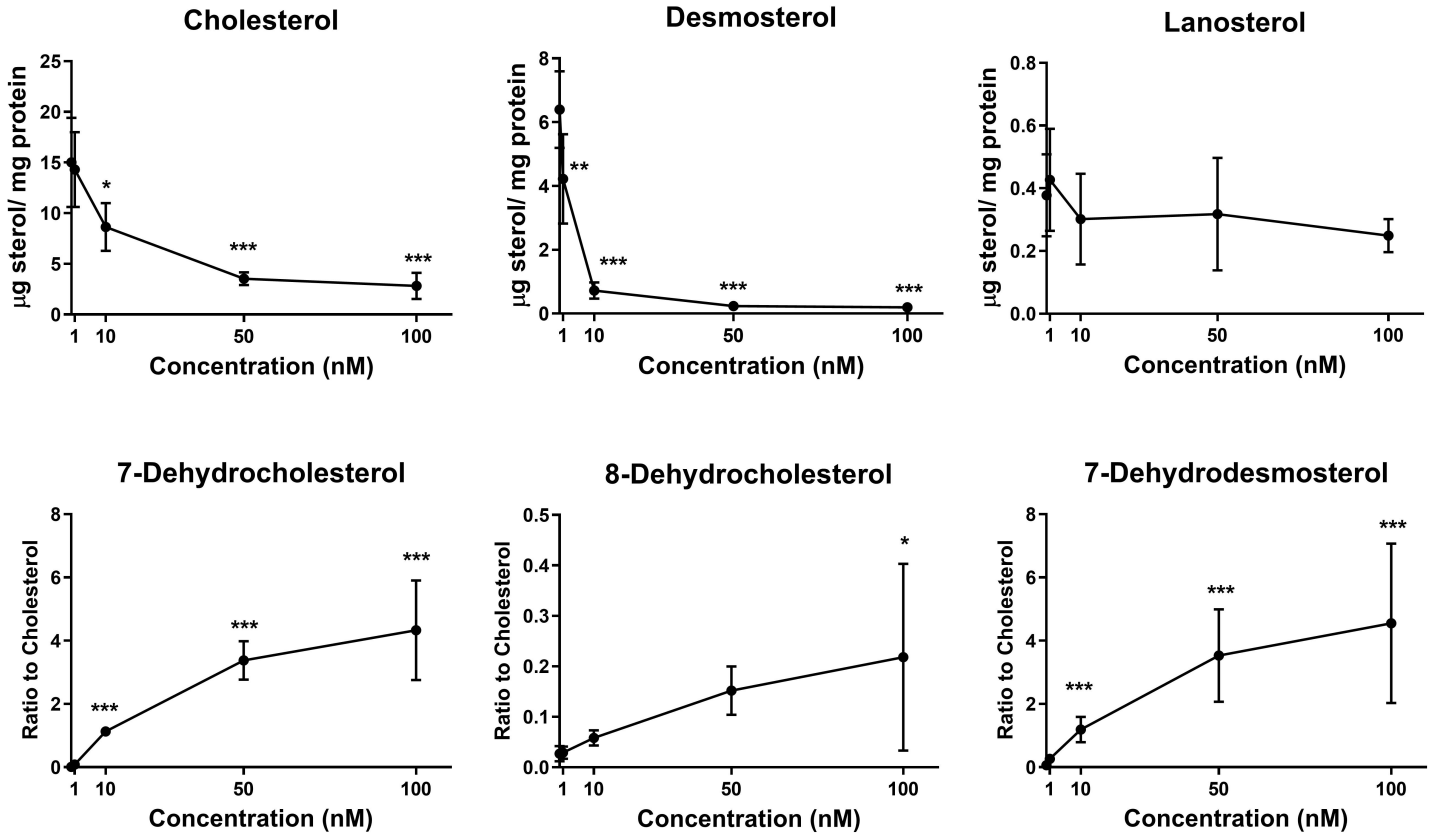

**Figure S1. Inhibition of cholesterol biosynthesis by AY9944 in neurospheres.** Neurospheres exposed to vehicle control (0 nM) or AY9944 at 1, 10, 50, and 100 nM from DIV 4 to DIV 7 show alterations in levels of sterols in the post-squalene cholesterol biosynthetic pathway. N = 4 biological replicates per condition. Adjusted *P* value: \*, *P* < 0.05; \*\*, *P* < 0.01; \*\*\*, *P* < 0.001 All adjusted *P*-value < 0.05.

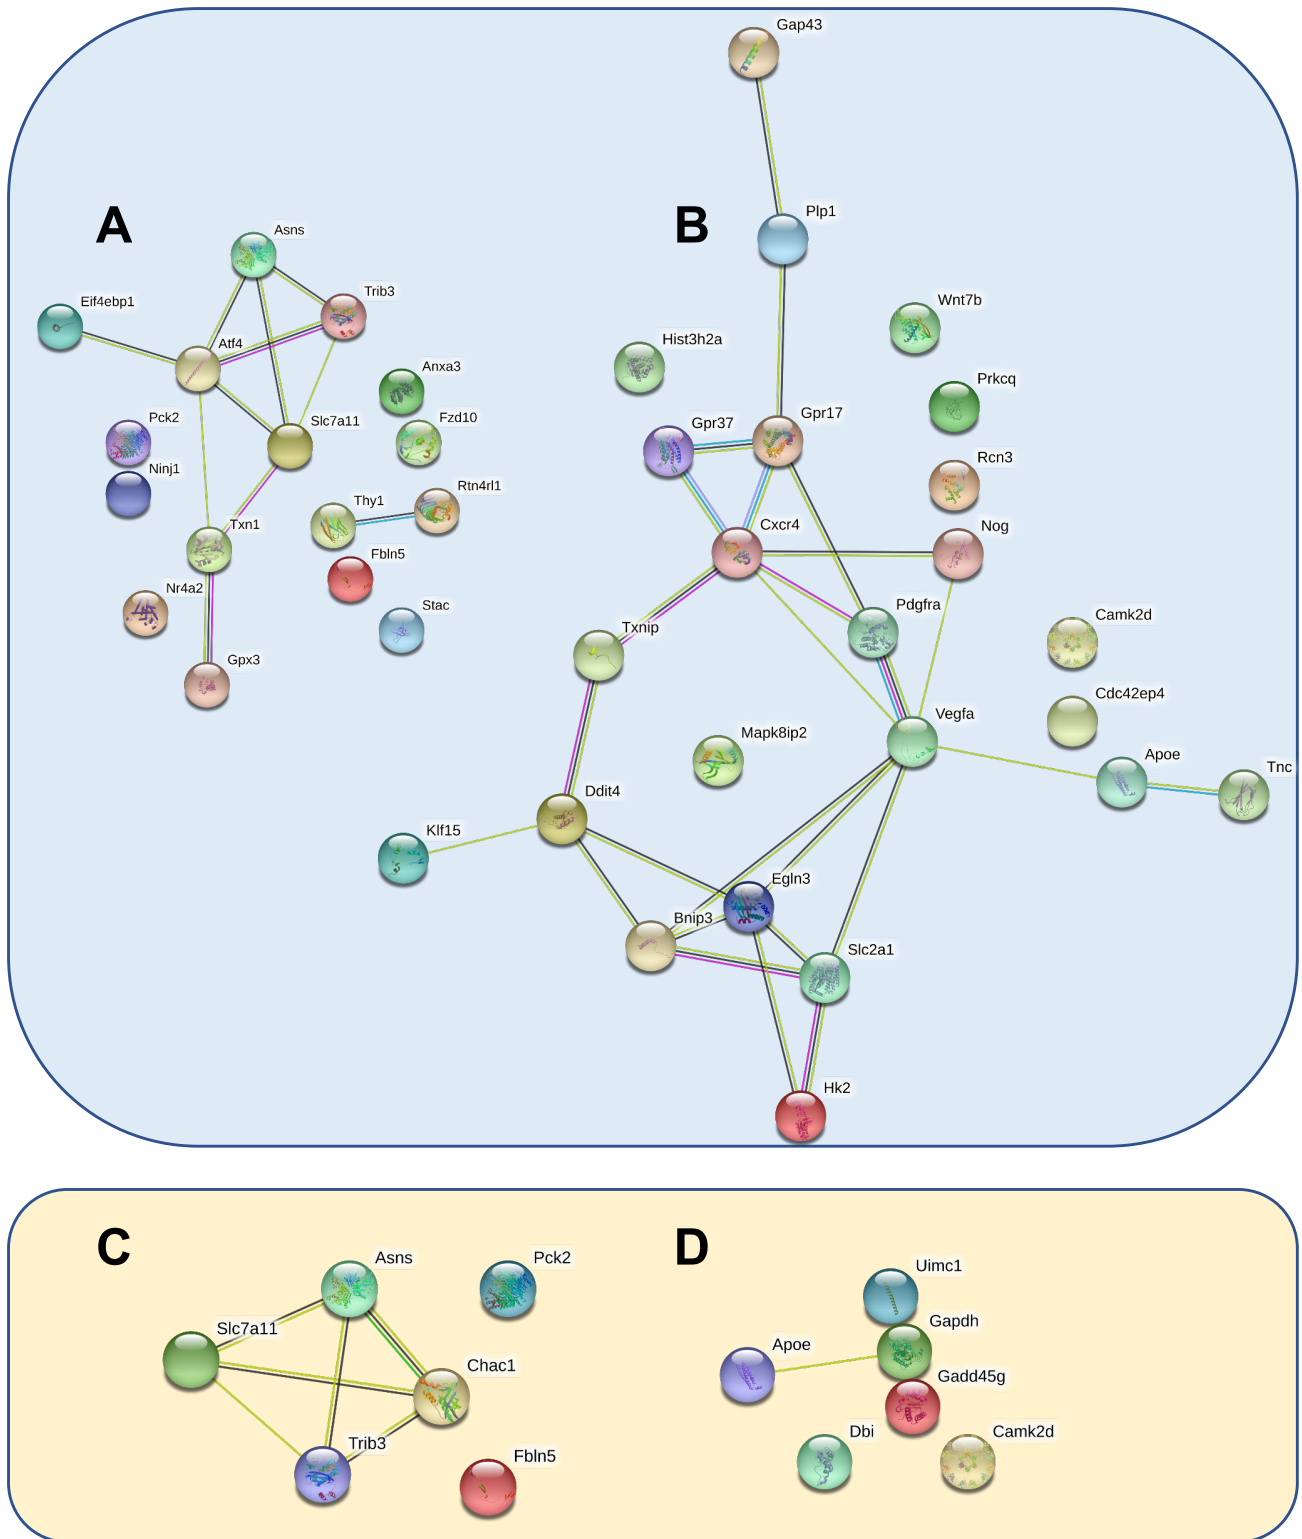

**Figure S2. STRING networks of DEGs involved in the integrated stress response.** Top: STRING networks of DEGs upregulated (A) or downregulated (B) in response to BAC C12 exposure. Bottom: STRING networks of DEGs upregulated (C) or downregulated (D) in response to BAC C16 exposure. n=3 biological replicates per condition. All adjusted P-value < 0.05.

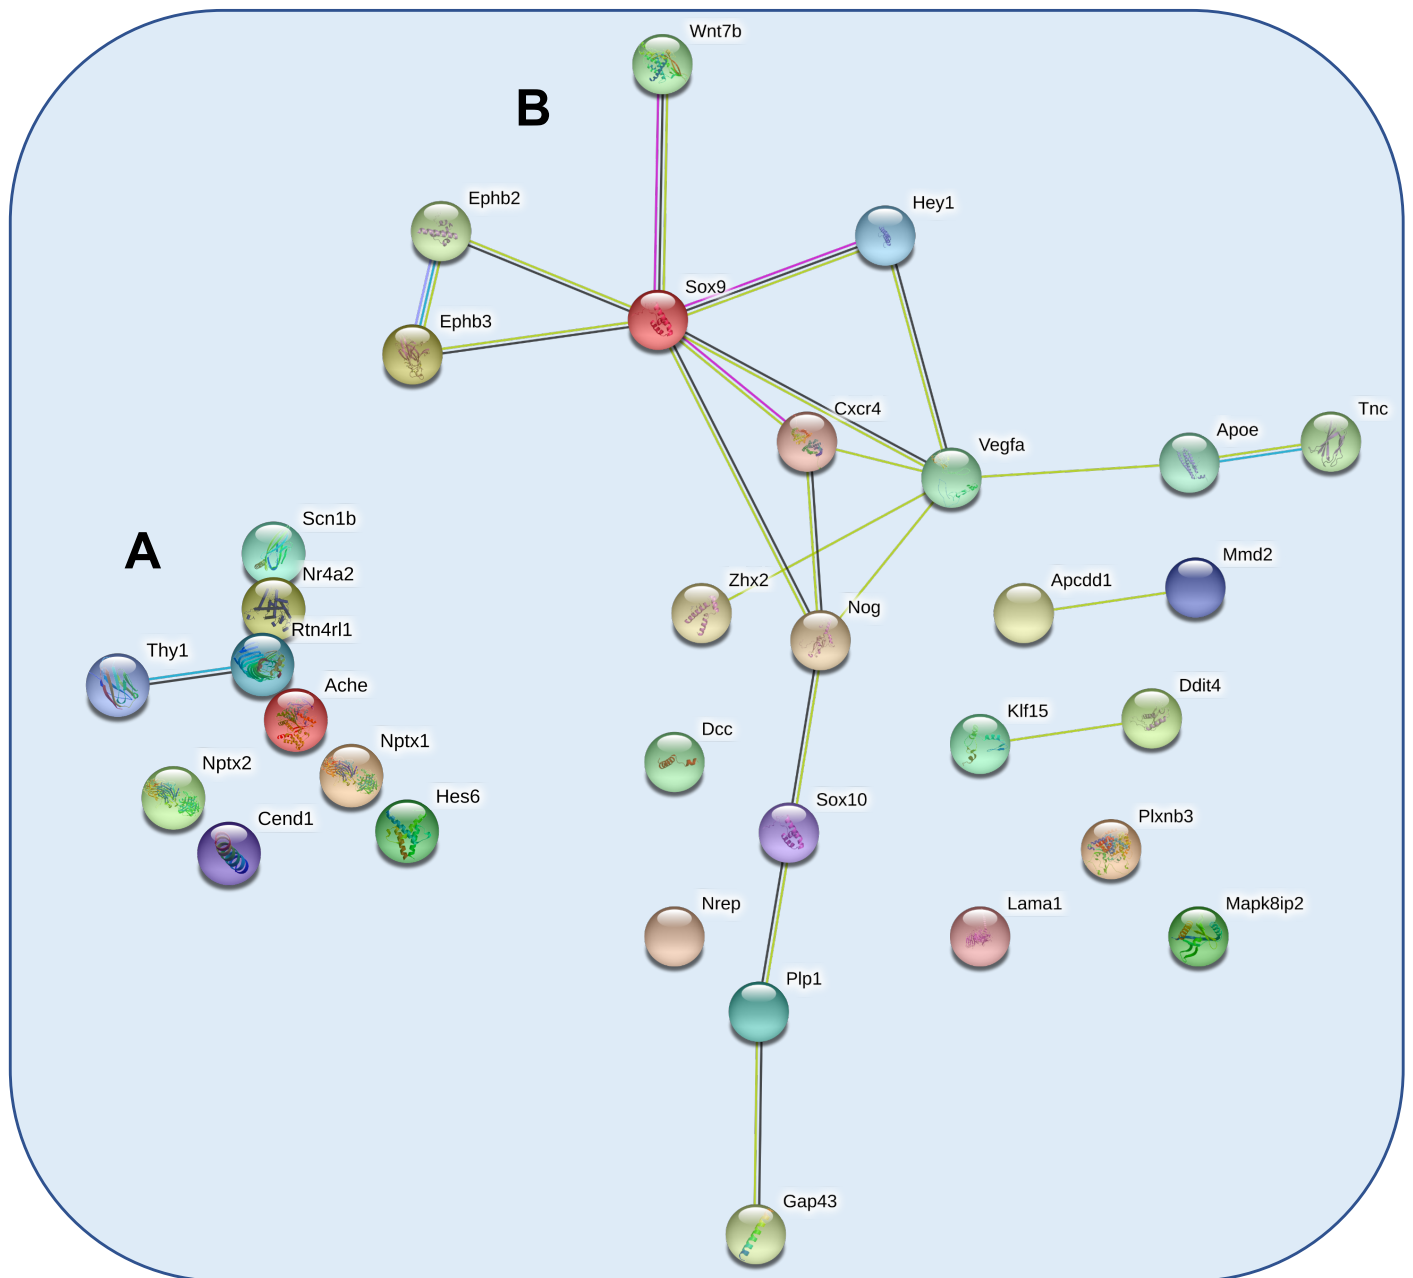

**Figure S3. DEGs from BAC C12-exposed neurospheres involved in neurogenesis.** (A) DEGs involved in the GO biological process of neurogenesis that are upregulated in response to BAC C12 exposure. (B) DEGs involved in the GO biological process of neurogenesis that are downregulated in response to BAC C12 exposure. n=3 biological replicates per condition. All adjusted P-values < 0.05.

**Table S1.** Top 10 biological processes altered by both BACs.

| GO Biological Process                                 | BAC C12 vs. Control |         |                      | BAC C16 vs. Control |         |                      |
|-------------------------------------------------------|---------------------|---------|----------------------|---------------------|---------|----------------------|
|                                                       | # DEGs              | # Total | -log <i>P</i> -value | # DEGs              | # Total | -log <i>P</i> -value |
| response to stress                                    | 41                  | 2214    | 15.84                | 12                  | 2205    | 6.44                 |
| phosphate-containing<br>compound metabolic<br>process | 18                  | 674     | 13.29                | 5                   | 665     | 4.84                 |
| Phosphorylation                                       | 15                  | 508     | 13.29                | 4                   | 499     | 4.38                 |
| cell death                                            | 26                  | 1523    | 8.29                 | 8                   | 1508    | 4.34                 |
| programmed cell death                                 | 25                  | 1453    | 8.16                 | 8                   | 1446    | 4.65                 |
| apoptotic process                                     | 21                  | 1216    | 7.06                 | 7                   | 1201    | 4.54                 |
| regulation of transport                               | 31                  | 2084    | 6.67                 | 10                  | 2066    | 4.39                 |
| small molecule<br>metabolic process                   | 22                  | 1337    | 6.55                 | 8                   | 1331    | 5.28                 |
| chemical homeostasis                                  | 21                  | 1308    | 5.94                 | 8                   | 1301    | 5.46                 |
| MAPK cascade                                          | 19                  | 1193    | 5.37                 | 11                  | 1178    | 12.29                |
